# Supplementary material for: Interactions of gold-based drugs with proteins: the structure and stability of the adduct formed in the reaction between lysozyme and the cytotoxic gold(iii) compound Auoxo3
Source: Royal Society of Chemistry journal article supplement (doi:10.1039/c4dt02332c), 2014-09-25
Supplement: c4dt02332c1.pdf [file c4dt02332c1.pdf]

## Supplementary material

### **Interactions of Gold-based Drugs with Proteins: Structure and Stability of the Adduct Formed in the reaction between Lysozyme and the Cytotoxic Gold(III) Compound Auoxo3**

Irene Russo Krauss,<sup>a,b</sup> Luigi Messori,<sup>c</sup> Maria Agostina Cinellu,<sup>d</sup> Daniela Marasco,<sup>e,b</sup> Rosalba Sirignano,<sup>a</sup> and Antonello Merlino<sup>a,b\*</sup>

\*Correspondence to:

A. Merlino

Department of Chemical Sciences, University of Naples Federico II, Complesso Universitario di Monte Sant' Angelo

Via Cintia, I-80126, Napoli, Italy

Phone: (+39)081674276; Fax: (+39)081674090

E-mail: [antonello.merlino@unina.it](mailto:antonello.merlino@unina.it)

Supplementary figure S1-S4

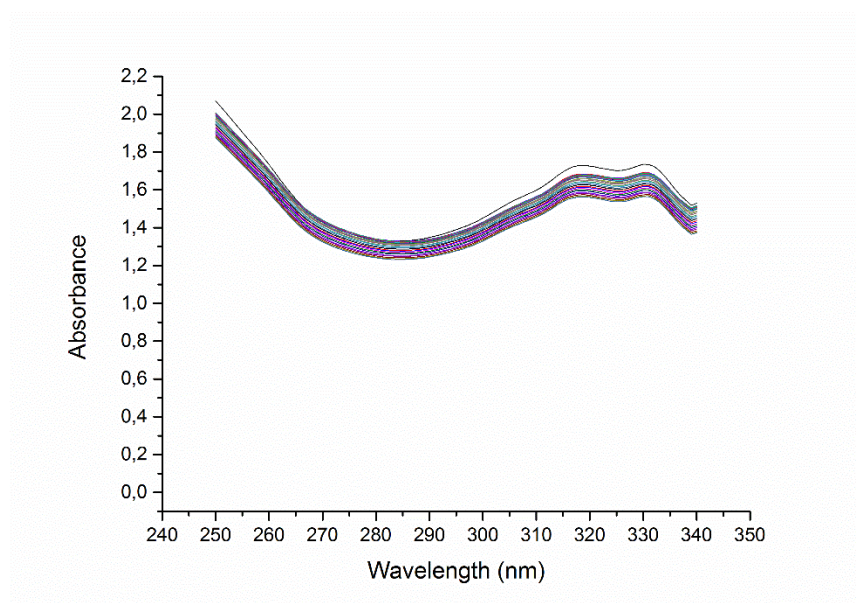

**Figure S1** UV spectra of Auoxo3 in the presence of HEWL (metal:protein ratio of 10:1), dissolved in sodium phosphate buffer pH 7.4. Spectra were collected every 10 minutes for 330 minutes.

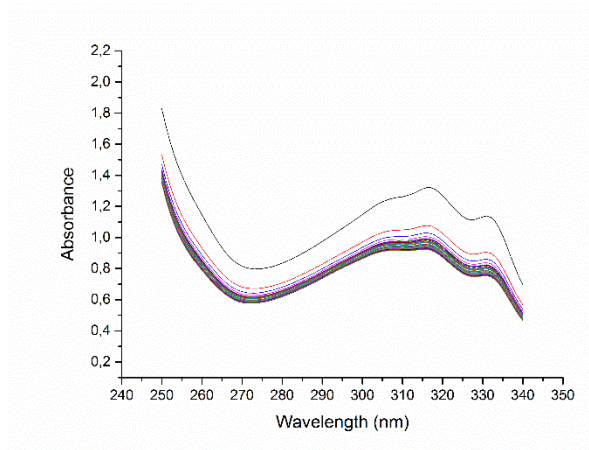

**A**

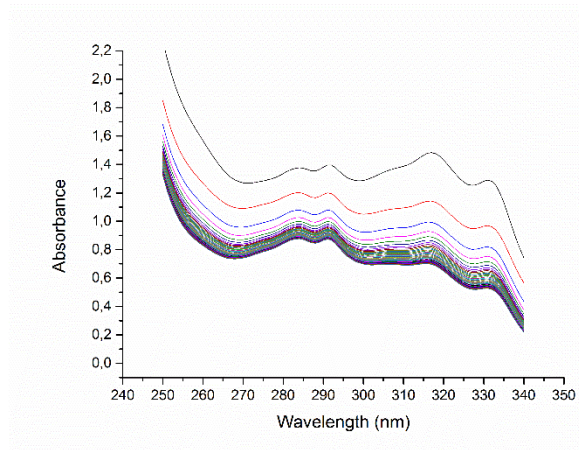

**B**

**Figure S2** UV spectra of Auoxo3 in the absence (panel A) and in the presence (panel B) of HEWL (metal:protein ratio of 10:1), dissolved in the crystallization solution (i.e. ethylene glycol and sodium acetate buffer pH 4.4). Spectra were collected every 10 minutes for 330 minutes.

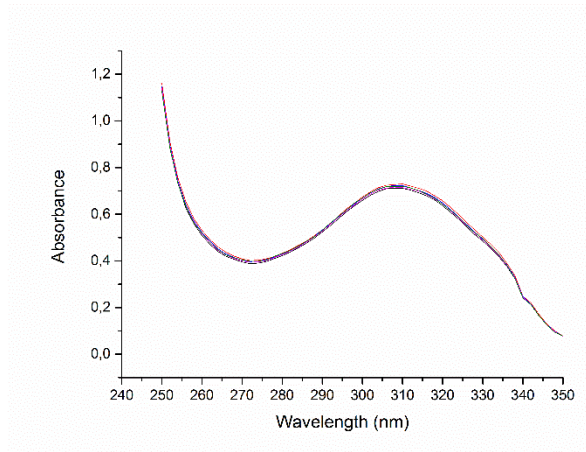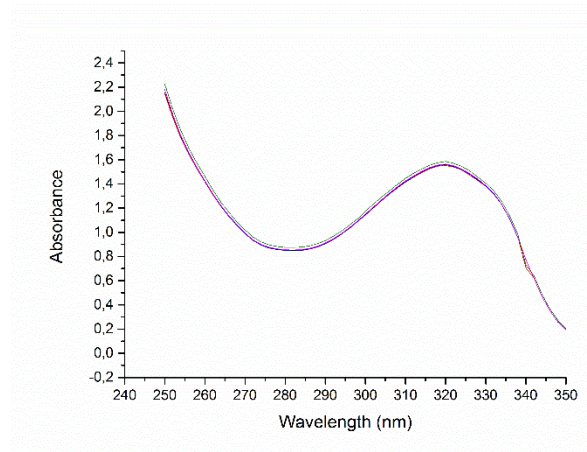

**A**

**B**

**Figure S3** UV spectra of Aubipi<sup>c</sup> in the absence (panel A) and in the presence (panel B) of HEWL (metal:protein ratio of 10:1), dissolved in the HEWL-Auoxo3 crystallization solution (i.e. ethylene glycol and sodium acetate buffer pH 4.4). Spectra at  $t = 0$  min, 60 min, 120 min, 180 min and 24 h are reported.

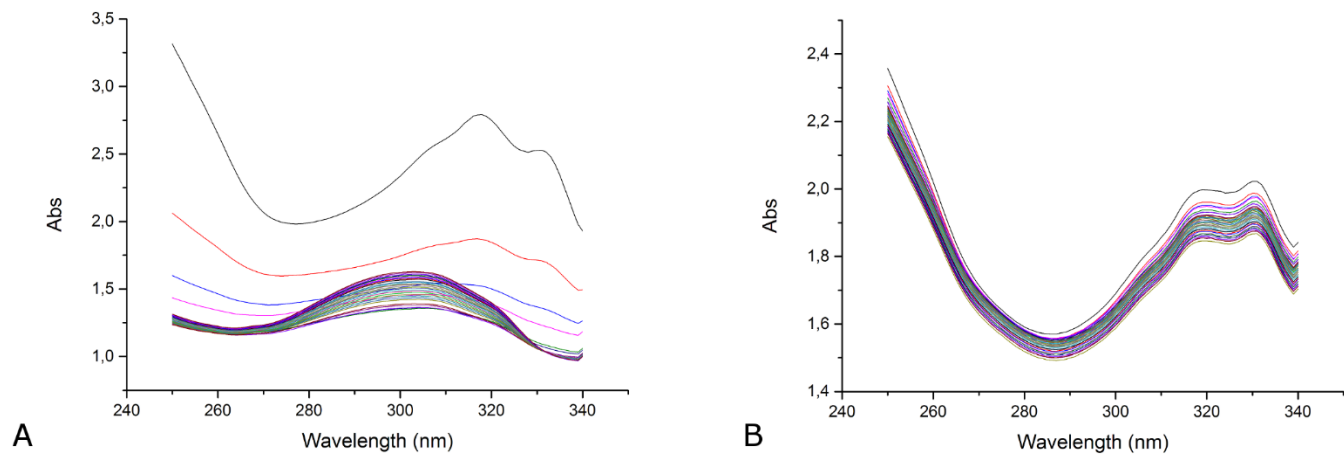

**Figure S4** UV spectra of Auoxo3 in the absence (panel A) and in the presence (panel B) of HEWL (metal:protein ratio of 10:1), dissolved in NaCl 1 M and sodium acetate buffer 0.1 M pH 4.4. Spectra were collected every 10 minutes for 330 minutes.
